# Supplementary material for: Proper nozzle configuration helps clean around the bit
Source: MDPI journal article supplement (doi:10.3390/genes14091805), 1984-12-01
Supplement: s1 [file s1]

**Table S1.** PCR and pyrosequencing primers.

| Amplification primer (PCR)         |                                 |
|------------------------------------|---------------------------------|
| Forward                            | 5'-GTTTTTAATTTTTCCTAAAACCTG-3'  |
| Reverse                            | 5'-biotin-CCTTCCCTAAAACCTCCC-3' |
| Sequencing primer (pyrosequencing) |                                 |
| Seq 1 – 35 to 39 CpG               | 5'-ATTTTTCCTAAAACCTGT-3'        |
| Seq 2 – 40 CpG                     | 5'-ATTGGTTTTTTTGGGG-3'          |
| Seq 3 – 43 to 47 CpG               | 5'-TTTAGTTTTTTTTT-3'            |
