# Supplementary material for: Proper nozzle configuration helps clean around the bit
Source: MDPI journal article supplement (doi:10.3390/genes14091805), 1984-12-01
Supplement: s1 [file s1]

**Table S2.** Allele distributions of *NR3C1* polymorphisms investigated in this study.

| <i>NR3C1</i> genetic variant | Mennonite             | European Non Finish | Mennonite vs.<br>European Non Finish | Amish     | Mennonite vs.<br>Amish      | Brazilian | Mennonite vs.<br>Brazilian  |
|------------------------------|-----------------------|---------------------|--------------------------------------|-----------|-----------------------------|-----------|-----------------------------|
|                              | n/N total (frequency) | n/N total           | <i>p</i> corr                        | n/N total | <i>p</i> corr               | n/N total | <i>p</i> corr               |
| rs258763 A>T                 | 351/602 (0.583)       | 38374/67970         | 0.12                                 | 585/906   | 0.074                       | 1065/2342 | <b>7.4x10<sup>-11</sup></b> |
| rs6196 T>C                   | 130/650 (0.2)         | 10879/68000         | <b>0.011</b>                         | 221/912   | <b>0.049</b>                | 288/2342  | <b>4.3x10<sup>-6</sup></b>  |
| rs926407137 G>A              | 10/650 (0.015)        | 0/66766             | <b>1.9x10<sup>-20</sup></b>          | 0/908     | <b>2.3x10<sup>-4</sup></b>  | NA        | -                           |
| rs17209258 T>C               | 119/650 (0.18)        | 14468/67838         | 0.1                                  | 258/910   | <b>1.5x10<sup>-5</sup></b>  | 410/2342  | 0.64                        |
| rs34176759 TA>T              | 69/650 (0.108)        | 14394/67950         | <b>9.6x10<sup>-12</sup></b>          | 254/906   | <b>1.1x10<sup>-16</sup></b> | 401/2342  | <b>6.6x10<sup>-5</sup></b>  |
| rs33944801 G>C               | 67/650 (0.105)        | 14394/67928         | <b>1.7x10<sup>-12</sup></b>          | 254/908   | <b>2.9x10<sup>-17</sup></b> | 401/2342  | <b>2.9x10<sup>-5</sup></b>  |
| rs258813 C>T                 | 272/650 (0.418)       | 21892/67952         | <b>5.8x10<sup>-7</sup></b>           | 302/912   | <b>5.3x10<sup>-4</sup></b>  | 642/2342  | <b>1.9x10<sup>-11</sup></b> |
| rs761295829 C>T              | 2/650 (0.003)         | 0/68018             | <b>2.7x10<sup>-4</sup></b>           | 0/912     | 0.26                        | NA        | -                           |
| rs6188 G>T                   | 272/650 (0.274)       | 21933/67972         | <b>5.9x10<sup>-7</sup></b>           | 301/910   | <b>4.4x10<sup>-4</sup></b>  | 642/2342  | <b>1.4x10<sup>-11</sup></b> |
| rs56149945 A>G               | 27/650 (0.041)        | 2244/68032          | 0.22                                 | 1/912     | <b>1.9x10<sup>-9</sup></b>  | 34/2342   | <b>9.6x10<sup>-5</sup></b>  |
| rs6190 G>A                   | 35/650 (0.054)        | 1863/68046          | <b>1.3x10<sup>-4</sup></b>           | 1/912     | <b>1.8x10<sup>-12</sup></b> | 31/2342   | <b>2.6x10<sup>-8</sup></b>  |
| rs6189 G>A                   | 35/650 (0.054)        | 1863/68046          | <b>1.3x10<sup>-4</sup></b>           | 1/912     | <b>1.8x10<sup>-12</sup></b> | 31/2342   | <b>2.6x10<sup>-8</sup></b>  |
| rs192978343 T>G              | 4/650 (0.006)         | 399/68032           | 0.80                                 | 4/912     | 0.80                        | 3/2342    | 0.13                        |
| rs6877893 C>T                | 261/600 (0.435)       | 31437/67914         | 0.086                                | 352/908   | 0.16                        | 1235/2342 | <b>5.5x10<sup>-6</sup></b>  |
| rs41423247 C>G               | 220/602 (0.365)       | 25257/67930         | 0.91                                 | 478/910   | <b>3.3x10<sup>-9</sup></b>  | 685/2342  | <b>6.4x10<sup>-5</sup></b>  |
| rs10482614 G>A               | 130/650 (0.2)         | 10607/67986         | <b>0.004</b>                         | 220/910   | 0.056                       | 279/2342  | <b>9.1x10<sup>-7</sup></b>  |
| rs571795102 A>G              | 23/650 (0.035)        | 178/67930           | <b>1.2x10<sup>-17</sup></b>          | 0/912     | <b>1.4x10<sup>-9</sup></b>  | 4/2342    | <b>4.4x10<sup>-12</sup></b> |
| rs10482606 T>C               | 3/650 (0.004)         | 380/67832           | 1.0                                  | 4/910     | 1.0                         | 3/2328    | 0.37                        |
| rs10482605 T>C               | 142/650 (0.218)       | 11398/67686         | <b>0.0014</b>                        | 81/912    | <b>3.7x10<sup>-12</sup></b> | 362/2342  | <b>3.7x10<sup>-4</sup></b>  |
| rs5871845 G>GC               | 44/650 (0.067)        | 3799/67956          | 0.3                                  | 34/912    | <b>0.027</b>                | NA        | -                           |
| rs3806854 T>C                | 124/648 (0.19)        | 10337/64314         | <b>0.041</b>                         | 213/864   | <b>0.019</b>                | 278/2342  | <b>1.1x10<sup>-5</sup></b>  |
| rs3806855 T>G                | 125/648 (0.19)        | 10356/65778         | <b>0.025</b>                         | 213/880   | <b>0.025</b>                | 278/2342  | <b>7.6x10<sup>-6</sup></b>  |

**Table S2.** *cont*

|                  |                 |             |                            |         |                            |           |              |
|------------------|-----------------|-------------|----------------------------|---------|----------------------------|-----------|--------------|
| rs1192533423 T>G | 26/650 (0.04)   | 503/37336   | <b>6.0x10<sup>-6</sup></b> | 19/494  | 1.0                        | NA        | -            |
| rs7701443 T>C    | 242/592 (0.408) | 27510/67962 | 0.76                       | 309/912 | <b>0.027</b>               | 1076/2342 | <b>0.016</b> |
| rs72802813 C>T   | 116/604 (0.192) | 12965/67898 | 0.96                       | 107/912 | <b>3.2x10<sup>-4</sup></b> | 444/2342  | 0.96         |

In bold: significant. P-value was corrected by Benjamini & Hochberg method. n: number of allele count; NA: no data available.
